# Supplementary material
Source: PubMed Central journal article supplement (PMC4678439)
Supplement: mmc1.pdf [file mmc1.pdf]

The American Journal of Human Genetics

Supplemental Data

**Autosomal-Recessive Intellectual Disability with  
Cerebellar Atrophy Syndrome Caused by Mutation  
of the Manganese and Zinc Transporter Gene *SLC39A8***

Kym M. Boycott, Chandree L. Beaulieu, Kristin D. Kernohan, Ola H. Gebril, Aziz Mhanni, Albert E. Chudley, David Redl, Wen Qin, Sarah Hampson, Sébastien Küry, Martine Tetreault, Erik G. Puffenberger, James N. Scott, Stéphane Bezieau, André Reis, Steffen Uebe, Johannes Schumacher, Robert A. Hegele, D. Ross McLeod, Marina Gálvez-Peralta, Jacek Majewski, Vincent T. Ramaekers, Care4Rare Canada Consortium, Daniel W. Nebert, A. Micheil Innes, Jillian S. Parboosingh, and Rami Abou Jamra

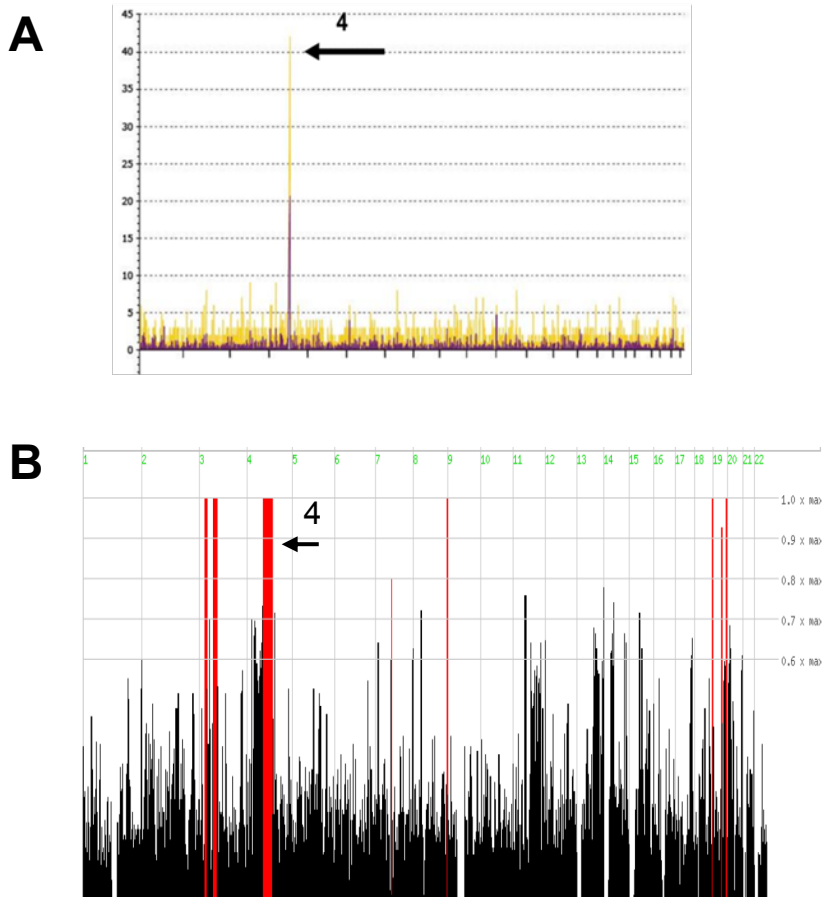

### Figure S1. Genome-wide Homozygosity Mapping

(A) Identity-by-descent mapping was performed using DNA from Individuals 1, 2, and 3 (Hutterite) and GeneChip Human Mapping 10 K (Xba 2.0) and 50 K (Xba 240) arrays. We identified a single shared 11.7 Mb homozygous region at 4q22-25.

(B) Identity-by-descent mapping was performed using DNA from individuals 7 and 8 (Egyptian) and their mother using the HumanCoreExome BeadChips (Illumina) with 240 K polymorphic variants and analyzing using the web-based application HomozygosityMapper. Six candidate regions spanning a total length of 72 Mb were identified.

**A**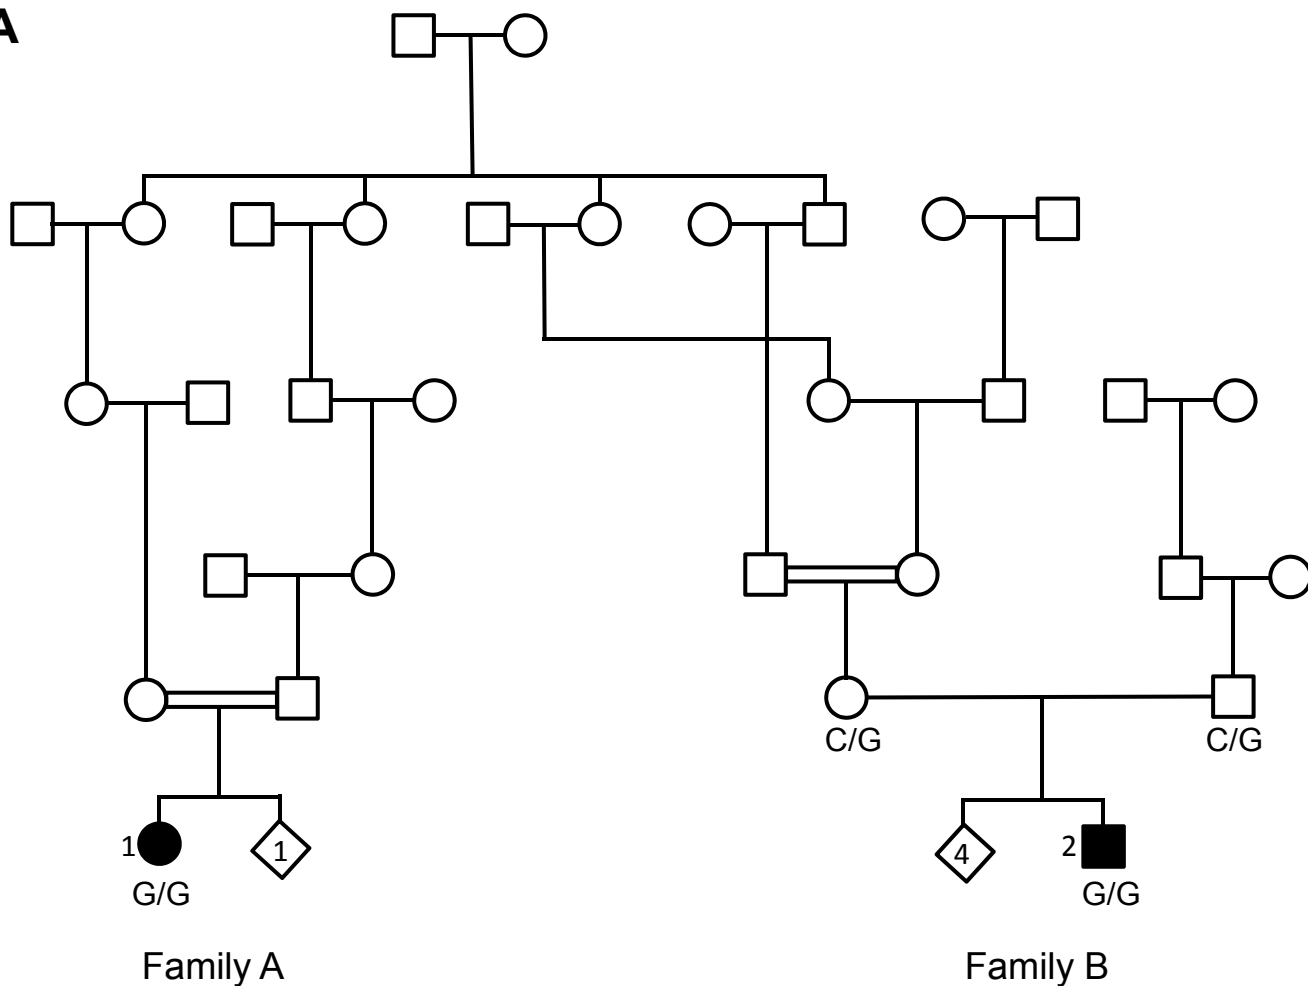**B**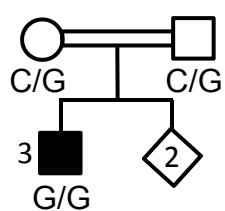**C**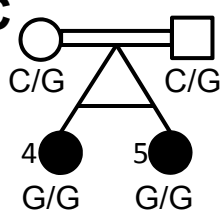**D**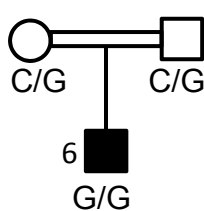**E**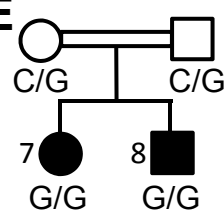

**Figure S2. Sanger Segregation of the c.112G>C, p.Gly38Arg SLC39A8 Variant**

(A) Pedigree and segregation indicating the relationship between Families A and B, individuals 1 and 2; (B-E) Pedigree and variant segregation of families C,D,E and F, individuals 3-8.

**Table S1. Haplotype Analysis of Egyptian and Hutterite Probands Reveals Maximum 181,077bp Region**

| Position              | dbSNP ID                 | Reference | Hutterite  | Egyptian   |
|-----------------------|--------------------------|-----------|------------|------------|
| Chr4:103174819        | 192068                   | G         | G/G        | A/A        |
| Chr4:103180875        | 189215                   | C         | C/C        | T/T        |
| Chr4:103184089        | 151393                   | A         | G/G        | G/G        |
| Chr4:103189416        | 13114343                 | G         | A/A        | A/A        |
| Chr4:103216782        | 62327949                 | A         | G/G        | G/G        |
| Chr4:103225255        | 985989                   | A         | A/A        | C/C        |
| Chr4:103225946        | 397692179                |           | A/A        | A/A        |
| Chr4:103228545        | 1462947                  | G         | A/A        | A/A        |
| Chr4:103265343        | 1462943                  | A         | A/A        | C/C        |
| <b>Chr4:103265708</b> | <b>SLC39A8 mutation*</b> | <b>C</b>  | <b>G/G</b> | <b>G/G</b> |
| Chr4:103446420        | 4647983                  | TG        | -          | TG/TG      |
| Chr4:103458825        | 230526                   | A         | A/A        | G/G        |
| Chr4:103458877        | 230525                   | G         | G/G        | A/A        |
| Chr4:103503824        | 4699030                  | G         | C/C        | G/G        |
| Chr4:103506095        | 1598858                  | A         | G/G        | A/A        |
| Chr4:103514445        | 1020760                  | C         | G/G        | C/C        |
| Chr4:103514658        | 1609993                  | T         | C/C        | C/C        |
| Chr4:103514741        | 4648050                  | T         | C/C        | C/C        |

\*Region of maximum haplotype sharing extends from SNP 1462943 to SNP 4647983, a distance of 181kb. The discordant SNP 1462943 is located within the first intron of SLC39A8, demonstrating that there is no extended common haplotype across the disease gene shared by the Hutterite and Egyptian patients.
